# Supplementary material
Source: publisher figshare collection journal article supplement (https://acs.figshare.com/ndownloader/files/4855516)
Supplement: Supplementary file 1 [file 4855516]

## Supporting Information

### Synthesis of $\alpha$ -Quartz with Controlled Properties for the Investigation of the Molecular Determinants in Silica Toxicology

*Linda Pastero, Francesco Turci, Riccardo Leinardi, Cristina Pavan, Marco Monopoli*

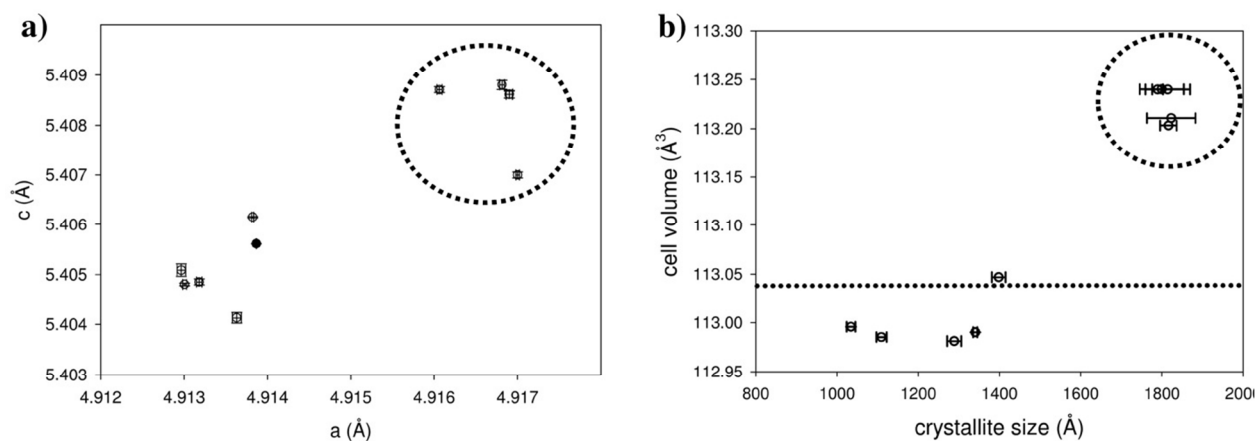

**Figure S1.** Comparison between the cell parameters (a), and the cell volume and crystallite size (b) of NG and CG (inside the dotted circle) crystals, as calculated by Rietveld refinement. The black point and the line represent the dimensional parameters of the SRM 1878a standard quartz sample.
